# Supplementary material for: Assessing Latrine Use in Rural India: A Cross-Sectional Study Comparing Reported Use and Passive Latrine Use Monitors
Source: PubMed Central journal article supplement (PMC5014284; doi:10.4269/ajtmh.16-0102), 2016-09-07
Supplement: SD9.pdf [file SD9.pdf]

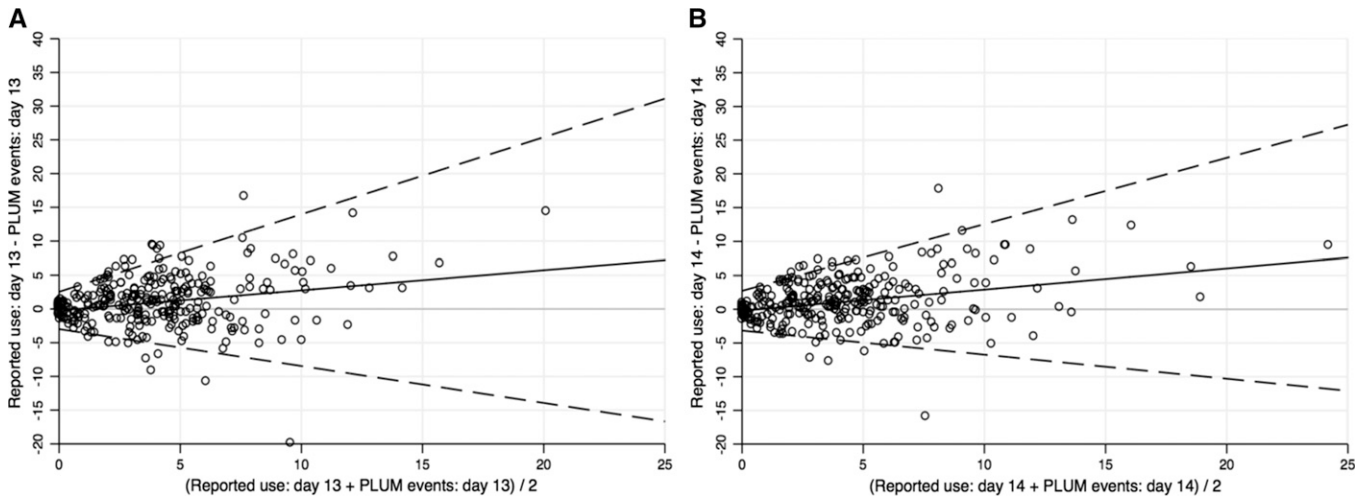

SUPPLEMENTAL FIGURE 1 Bland-Altman plots comparing (A) reported use on day 13 with PLUM-recorded events on day 13, (B) reported use on day 14 with PLUM-recorded events on day 14. The mean difference between methods (bias) is shown by the solid line and the dashed lines show the 95% limits of agreement, which is the interval expected to contain 95% of the differences between methods. For each comparison, both the mean difference and the variance between methods are observed to increase as the magnitude of the measurement increases.

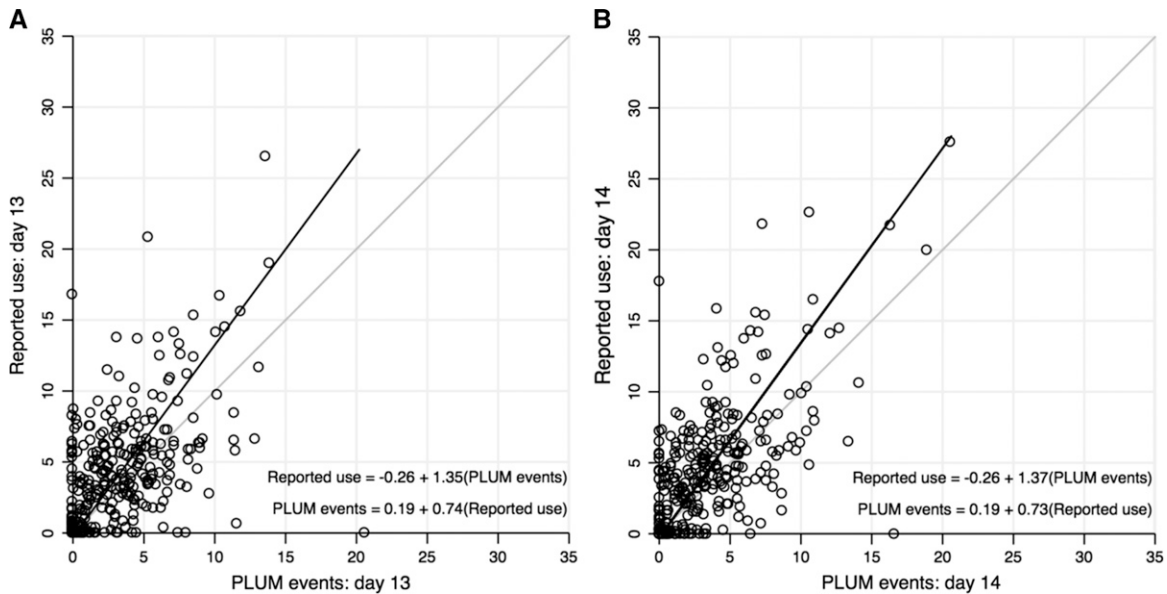

SUPPLEMENTAL FIGURE 2 Scatterplots of (A) reported use on day 13 and PLUM-recorded events on day 13, (B) reported use on day 14 and PLUM-recorded events on day 14. Symmetric prediction equations allowing for direct conversion between the methods are derived from the Bland-Altman analysis. The predicted value of one method (e.g., reported use) given the other (e.g., PLUM events) is displayed by the solid line. The shaded 45° line at the origin is the line of equality, indicating perfect agreement between the methods. In Figure 2A, reported use was, on average, 35% higher than recorded PLUM events on day 13 and in Figure 2B, it was 37% higher than recorded PLUM events on day 14.
